# Supplementary material
Source: PubMed Central journal article supplement (PMC4502665)
Supplement: kaup-11-04-1034409-s001.pdf [file kaup-11-04-1034409-s001.pdf]

**Table S1.** Upregulated genes in saline controls compared to fibrotic lungs at 28 days post-bleomycin treatment.

| <i>Refseq</i> | <i>Symbol</i>   | <i>Description</i>                                         | <i>Fold Change</i> | <i>p value</i> |
|---------------|-----------------|------------------------------------------------------------|--------------------|----------------|
| NM_009469     | <i>Ulk1</i>     | Unc-51 like kinase 1                                       | 4.4248             | 0.015054       |
| NM_007527     | <i>Bax</i>      | Bcl2-associated X protein                                  | 3.605              | 0.000785       |
| NM_053069     | <i>Atg5</i>     | Autophagy-related 5                                        | 3.5466             | 0.001619       |
| NM_174874     | <i>Atg4b</i>    | Autophagy-related 4B, cysteine peptidase                   | 3.4983             | 0.01307        |
| NM_010175     | <i>Fadd</i>     | Fas (TNFRSF6)-associated via death domain                  | 3.234              | 0.00684        |
| NM_001002897  | <i>Atg9b</i>    | Autophagy-related 9B                                       | 3.2117             | 0.001579       |
| NM_010480     | <i>Hsp90aa1</i> | Heat shock protein 90, alpha (cytosolic), class A member 1 | 2.9606             | 0.000788       |
| NM_010503     | <i>Ifna2</i>    | Interferon alpha 2                                         | 2.8481             | 0.001013       |

QPCR-based comparisons from autophagy array gene-expression profile in lungs from saline control compared to bleomycin-treated mice sacrificed after 28 days revealed significant upregulation of several genes in response to bleomycin challenge. The fold change was calculated by the  $2^{-\Delta\Delta CT}$  method.

**Table S2.** Downregulated genes in saline controls compared to fibrotic lungs at 28 days post-bleomycin treatment.

| <i>Refseq</i> | <i>Symbol</i>    | <i>Description</i>                                                  | <i>Fold Change</i> | <i>p value</i> |
|---------------|------------------|---------------------------------------------------------------------|--------------------|----------------|
| NM_145570     | <i>Eva1a</i>     | Eva-1 homolog A                                                     | -2.1386            | 0.038347       |
| NM_026693     | <i>Gabarapl2</i> | Gamma-aminobutyric acid (GABA) A receptor-associated protein-like 2 | -2.1835            | 0.001271       |
| NM_026013     | <i>Dram2</i>     | DNA-damage regulated autophagy modulator 2                          | -2.7063            | 0.00015        |

QPCR-based comparisons from autophagy array gene-expression profile in lungs from saline control compared to bleomycin-treated mice sacrificed after 28 days revealed significant downregulation of several genes in response to bleomycin challenge. The fold change was calculated by the  $2^{-\Delta\Delta CT}$  method.

**Table S3.** Upregulated genes in lungs from *atg4b*<sup>-/-</sup> compared to WT mice at 28 days post-bleomycin treatment.

| <i>Refseq</i> | <i>Symbol</i>   | <i>Description</i>                                          | <i>Fold Change</i> | <i>p value</i> |
|---------------|-----------------|-------------------------------------------------------------|--------------------|----------------|
| NM_008356     | <i>Il13ra2</i>  | Interleukin 13 receptor, alpha 2                            | 10.9132            | 0.001773       |
| NM_007743     | <i>Colla2</i>   | Collagen, type I, alpha 2                                   | 9.3697             | 0.000755       |
| NM_011595     | <i>Timp3</i>    | Tissue inhibitor of metalloproteinase 3                     | 7.2                | 0.000505       |
| NM_009930     | <i>Col3a1</i>   | Collagen, type III, alpha 1                                 | 5.52               | 0.002442       |
| NM_009911     | <i>Cxcr4</i>    | Chemokine (C-X-C motif) receptor 4                          | 5.1982             | 0.000595       |
| NM_016769     | <i>Smad3</i>    | SMAD family member 3                                        | 5.0095             | 0.003539       |
| NM_008607     | <i>Mmp13</i>    | Matrix metalloproteinase 13                                 | 3.5016             | 0.005072       |
| NM_013565     | <i>Itga3</i>    | Integrin alpha 3                                            | 3.4935             | 0.001528       |
| NM_009825     | <i>Serpinh1</i> | Serine (or cysteine) peptidase inhibitor, clade H, member 1 | 3.4774             | 0.001507       |
| NM_009371     | <i>Tgfb2</i>    | Transforming growth factor, beta receptor II                | 3.4534             | 0.004959       |
| NM_016780     | <i>Itgb3</i>    | Integrin beta 3                                             | 2.697              | 0.00747        |
| NM_009368     | <i>Tgfb3</i>    | Transforming growth factor, beta 3                          | 2.5105             | 0.010873       |

QPCR-based comparisons from fibrosis array gene-expression profile in lungs from *atg4b*<sup>-/-</sup> mice compared to WT littermates revealed significant upregulation of several genes in response to bleomycin challenge. The fold change was calculated by the  $2^{-\Delta\Delta CT}$  method.

**Table S4.** Downregulated genes in lungs from *atg4b*<sup>-/-</sup> compared to WT mice at 28 days post-bleomycin treatment.

| <i>Refseq</i> | <i>Symbol</i> | <i>Description</i>                 | <i>Fold Change</i> | <i>p value</i> |
|---------------|---------------|------------------------------------|--------------------|----------------|
| NM_007616     | <i>Cav1</i>   | Caveolin 1, caveolae protein       | -17.0142           | 0.019982       |
| NM_021283     | <i>Il4</i>    | Interleukin 4                      | -2.9869            | 0.001497       |
| NM_001042660  | <i>Smad7</i>  | SMAD family member 7               | -2.3598            | 0.012914       |
| NM_008877     | <i>Plg</i>    | Plasminogen                        | -2.2171            | 0.018787       |
| NM_010427     | <i>Hgf</i>    | Hepatocyte growth factor           | -2.2018            | 0.012668       |
| NM_011330     | <i>Ccl11</i>  | Chemokine (C-C motif)<br>ligand 11 | -2.1615            | 0.01259        |

QPCR-based comparisons from fibrosis array gene-expression profile in lungs from *atg4b*<sup>-/-</sup> mice compared to WT littermates revealed significant downregulation of several genes in response to bleomycin challenge. The fold change was calculated by the  $2^{-\Delta\Delta CT}$  method.
